# Supplementary material
Source: PubMed Central journal article supplement (PMC7159276)
Supplement: mmc6.pdf [file mmc6.pdf]

## Identification of diagnostic markers for tuberculosis by proteomic fingerprinting of serum

Correspondence to:  
Prof Sanjeev Krishna  
s.krishna@sgul.ac.uk

|                                                      | Sensitivity | Specificity | Accuracy |
|------------------------------------------------------|-------------|-------------|----------|
| <b>Mass Peaks</b>                                    |             |             |          |
| All                                                  | 0.89        | 0.77        | 0.83     |
| 10 positive correlated and<br>10 negative correlated | 0.78        | 0.77        | 0.78     |
| <b>Markers</b>                                       |             |             |          |
| Transthyretin                                        | 0.94        | 0.52        | 0.73     |
| CRP                                                  | 0.82        | 0.48        | 0.65     |
| neopterin                                            | 0.71        | 0.74        | 0.72     |
| SAA                                                  | 0.82        | 0.52        | 0.68     |
| neopterin-SAA                                        | 0.88        | 0.61        | 0.75     |
| CRP-SAA                                              | 0.88        | 0.52        | 0.70     |
| CRP-neopterin                                        | 0.82        | 0.65        | 0.74     |
| Transthyretin-SAA                                    | 0.88        | 0.52        | 0.70     |
| Transthyretin-neopterin                              | 0.94        | 0.52        | 0.73     |
| Transthyretin-CRP                                    | 0.82        | 0.52        | 0.67     |
| Transthyretin-CRP-neopterin                          | 0.82        | 0.65        | 0.74     |
| Transthyretin-CRP-SAA                                | 0.71        | 0.78        | 0.74     |
| Transthyretin-neopterin-SAA                          | 0.82        | 0.74        | 0.78     |
| CRP-neopterin-SAA                                    | 0.82        | 0.52        | 0.67     |
| Transthyretin-CRP-neopterin-SAA                      | 0.88        | 0.74        | 0.81     |

**Webtable 3: SVM classifiers performance on selected mass cluster peaks and biomarkers of second dataset**
